# Supplementary material for: Comparison of drug release behavior of bacterial cellulose loaded with ibuprofen and propranolol hydrochloride
Source: Royal Society of Chemistry journal article supplement (doi:10.1039/d1ra07761a), 2021-01-01
Supplement: d1ra07761a1.pdf [file d1ra07761a1.pdf]

**S1 Analytical method validation of ibuprofen using UV-vis spectrophotometer**

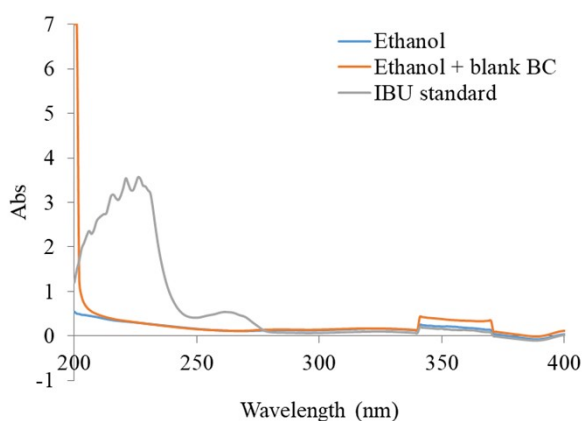

**Fig. S1.1** UV spectra of ethanol, ethanol used to extract blank BC and ibuprofen standard.

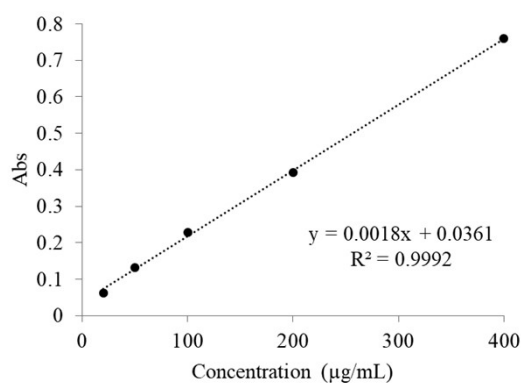

**Fig. S1.2** Calibration curve of ibuprofen at 265 nm, n = 3.

**Table S1.1** Accuracy and precision studies

| Amount of drug added (µg/mL) | Amount of drug found (µg/mL) | % Recovery | % RSD (intraday) | % RSD (interday) |
|------------------------------|------------------------------|------------|------------------|------------------|
| 50                           | 50.13                        | 100.26     | 1.24             | 1.21             |
|                              | 49.93                        | 99.86      |                  |                  |
|                              | 49.06                        | 98.13      |                  |                  |
| 100                          | 99.73                        | 99.73      |                  |                  |
|                              | 102.09                       | 102.09     |                  |                  |
|                              | 99.13                        | 99.13      |                  |                  |
| 200                          | 203.46                       | 101.73     |                  |                  |
|                              | 199.4                        | 99.70      |                  |                  |
|                              | 201.86                       | 100.93     |                  |                  |
| 50                           | 49.13                        | 98.26      | 1.25             |                  |
|                              | 50.01                        | 100.02     |                  |                  |
|                              | 50.46                        | 100.93     |                  |                  |
| 100                          | 101.80                       | 101.80     |                  |                  |
|                              | 98.82                        | 98.82      |                  |                  |
|                              | 101.20                       | 101.20     |                  |                  |
| 200                          | 198.86                       | 99.43      |                  |                  |
|                              | 201.46                       | 100.73     |                  |                  |
|                              | 197.26                       | 98.63      |                  |                  |

## S2 Analytical method validation of propranolol hydrochloride using UV-vis spectrophotometer

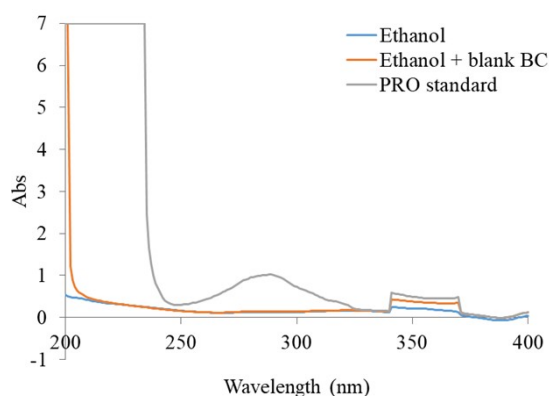

Fig. S2.1 UV spectra of ethanol, ethanol used to extract blank BC and propranolol hydrochloride standard.

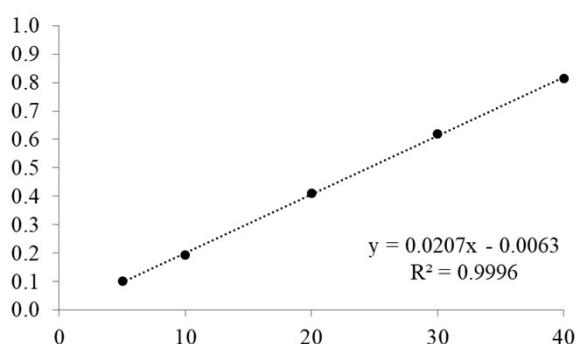

Fig. S2.2 Calibration curve of propranolol hydrochloride at 290 nm, n = 3.

Table S2.1 Accuracy and precision studies

| Amount of drug added ( $\mu\text{g/mL}$ ) | Amount of drug found ( $\mu\text{g/mL}$ ) | % Recovery | % RSD (intraday) | % RSD (interday) |
|-------------------------------------------|-------------------------------------------|------------|------------------|------------------|
| 10                                        | 9.98                                      | 99.81      | 1.32             | 1.34             |
|                                           | 10.21                                     | 102.19     |                  |                  |
|                                           | 10.13                                     | 101.35     |                  |                  |
| 20                                        | 19.62                                     | 98.10      | 1.27             | 1.34             |
|                                           | 20.19                                     | 100.95     |                  |                  |
|                                           | 19.85                                     | 99.29      |                  |                  |
| 30                                        | 29.93                                     | 99.78      | 1.27             | 1.34             |
|                                           | 29.86                                     | 99.56      |                  |                  |
|                                           | 30.52                                     | 101.73     |                  |                  |
| 10                                        | 10.04                                     | 100.49     | 1.27             | 1.34             |
|                                           | 9.91                                      | 99.11      |                  |                  |
|                                           | 10.26                                     | 102.61     |                  |                  |
| 20                                        | 20.05                                     | 100.27     | 1.27             | 1.34             |
|                                           | 20.34                                     | 101.72     |                  |                  |
|                                           | 20.01                                     | 100.07     |                  |                  |
| 30                                        | 30.73                                     | 102.44     | 1.27             | 1.34             |
|                                           | 30.46                                     | 101.54     |                  |                  |
|                                           | 30.82                                     | 102.75     |                  |                  |

### S3 Analytical method validation of ibuprofen using HPLC

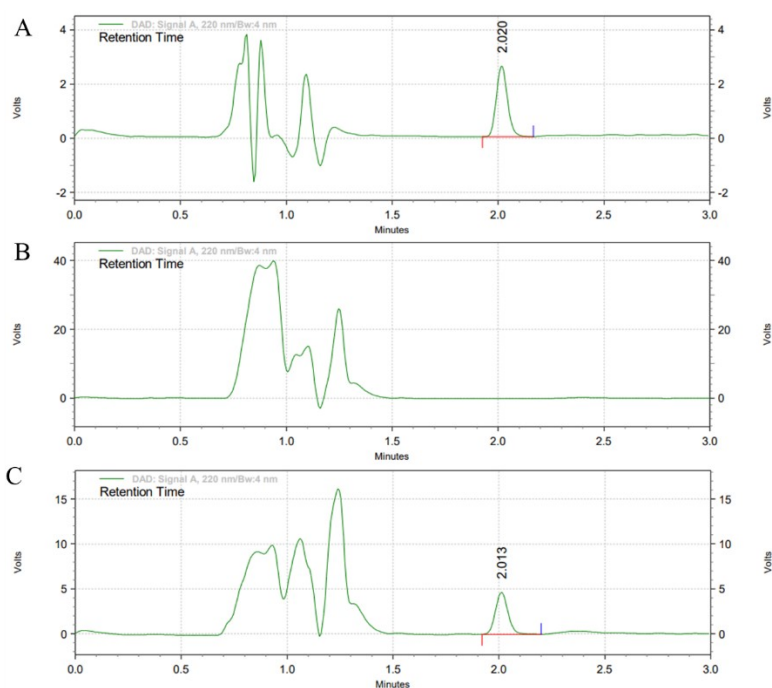

**Fig. S3.1** HPLC chromatogram of (A) ibuprofen standard, (B) dissolution medium (blank), and (C) sample

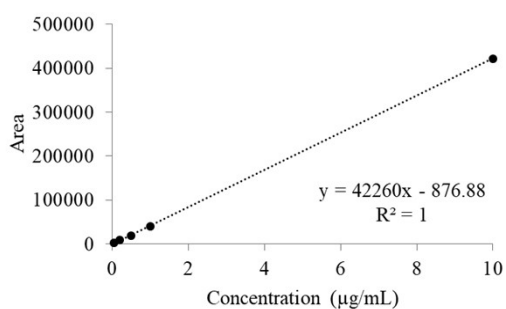

**Fig. S3.2** Calibration curve of ibuprofen, n = 3.

**Table S3.1** Accuracy and precision studies

| Amount of drug added (µg/mL) | Amount of drug found (µg/mL) | % Recovery | % RSD (intraday) | % RSD (interday) |
|------------------------------|------------------------------|------------|------------------|------------------|
| 0.2                          | 0.20                         | 101.04     | 1.28             | 1.30             |
|                              | 0.20                         | 102.26     |                  |                  |
|                              | 0.19                         | 99.09      |                  |                  |
| 0.5                          | 0.50                         | 100.40     | 1.39             |                  |
|                              | 0.50                         | 101.29     |                  |                  |
|                              | 0.50                         | 101.57     |                  |                  |
| 1                            | 1.00                         | 100.93     | 1.39             |                  |
|                              | 1.01                         | 101.69     |                  |                  |
|                              | 0.98                         | 98.22      |                  |                  |
| 0.2                          | 0.19                         | 99.99      | 1.39             | 1.30             |
|                              | 0.20                         | 101.60     |                  |                  |
|                              | 0.19                         | 99.12      |                  |                  |
| 5                            | 0.50                         | 101.38     | 1.39             |                  |
|                              | 0.50                         | 100.09     |                  |                  |
|                              | 0.48                         | 97.80      |                  |                  |
| 1                            | 1.02                         | 102.20     | 1.39             |                  |
|                              | 1.01                         | 101.54     |                  |                  |
|                              | 1.00                         | 100.88     |                  |                  |

### S4 Analytical method validation of propranolol hydrochloride using HPLC

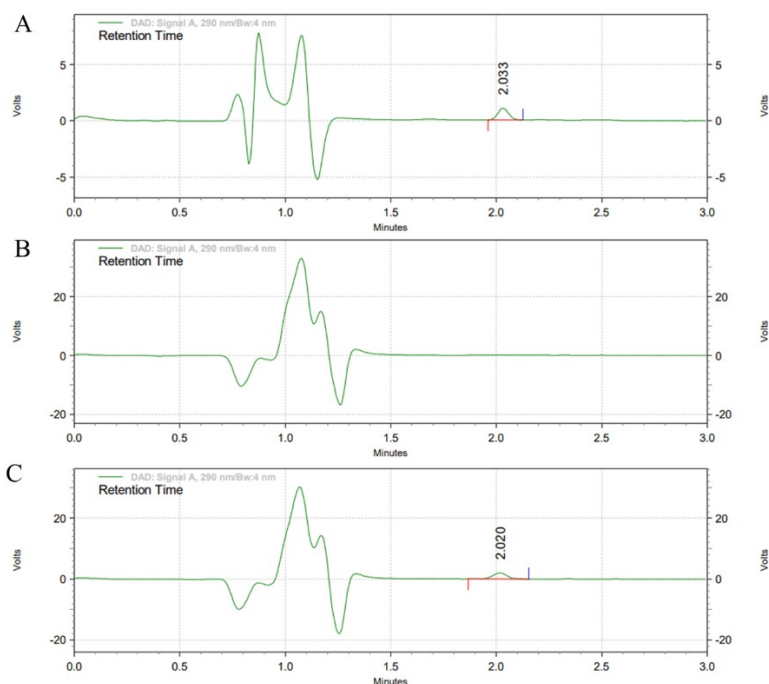

Fig. S4.1 HPLC chromatogram of (A) propranolol hydrochloride standard, (B) dissolution medium (blank), and (C) sample

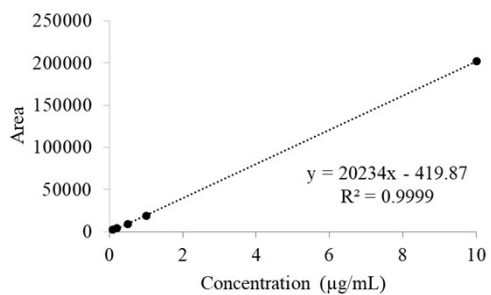

Fig. S4.2 Calibration curve of propranolol hydrochloride, n = 3.

Table S4.1 Accuracy and precision studies

| Amount of drug added (µg/mL) | Amount of drug found (µg/mL) | % Recovery | % RSD (intraday) | % RSD (interday) |
|------------------------------|------------------------------|------------|------------------|------------------|
| 0.2                          | 0.20                         | 102.30     | 1.26             | 1.59             |
|                              | 0.20                         | 101.96     |                  |                  |
|                              | 0.20                         | 100.31     |                  |                  |
| 0.5                          | 0.51                         | 103.07     | 1.26             | 1.59             |
|                              | 0.50                         | 100.24     |                  |                  |
|                              | 0.50                         | 101.15     |                  |                  |
| 1                            | 0.99                         | 99.38      | 1.26             | 1.59             |
|                              | 1.01                         | 101.24     |                  |                  |
|                              | 0.99                         | 99.44      |                  |                  |
| 0.2                          | 0.20                         | 100.06     | 1.91             | 1.59             |
|                              | 0.20                         | 101.34     |                  |                  |
|                              | 0.19                         | 98.03      |                  |                  |
| 5                            | 0.51                         | 103.32     | 1.91             | 1.59             |
|                              | 0.51                         | 102.38     |                  |                  |
|                              | 0.50                         | 100.97     |                  |                  |
| 1                            | 0.99                         | 99.87      | 1.91             | 1.59             |
|                              | 0.97                         | 97.29      |                  |                  |
|                              | 1.00                         | 100.83     |                  |                  |

## S5 FTIR analysis

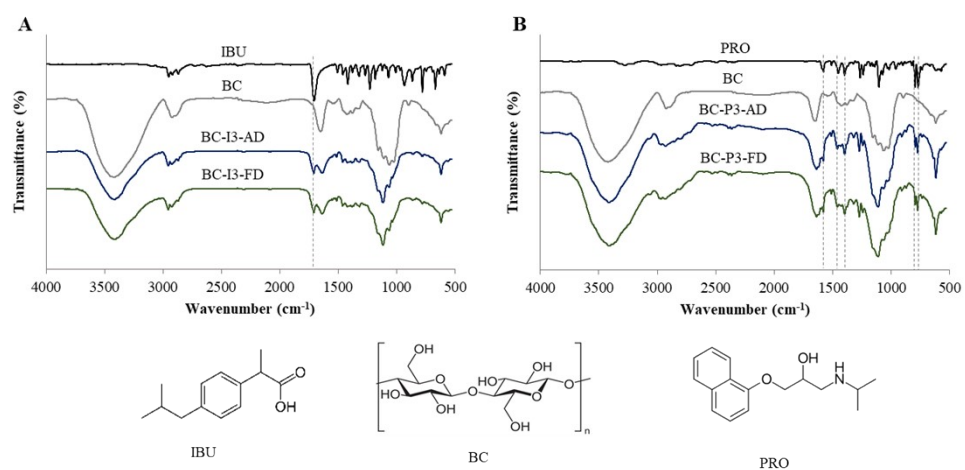

**Fig. S5.1** FTIR spectra of the pure drug, blank BC (BC), and BC loaded with related drug using two different drying methods; A is for ibuprofen (IBU) and B is for propranolol hydrochloride (PRO).
